# Supplementary material for: Biofunctionalized Magnetic Nanoparticles with Multiplex Touchdown PCR for Simultaneous and Rapid Detection/Identification of Campylobacter jejuni and Campylobacter coli
Source: Hindawi journal article supplement (doi:10.1155/2022/5104187), 2022-01-01
Supplement: f1 [file 5104187.f1.docx]

**Supplementary Materials**

**Table S1**

Bacterial strains used in this study.

| **No.** | **Bacterial** | **Strains** |
| --- | --- | --- |
| **inclusivity strains** | | |
| 1 | *Campylobacter jejuni* | ATCC 33560 |
| 2 | *C. jejuni* | DMST 29021 |
| 3 | *C. jejuni* (23 isolates) | FSC1-FSC23 |
| 4 | *Campylobacter coli* | NTCC 11353 |
| 5 | *C. coli* | DMST 28030 |
| 6 | *C. coli* (23 isolates) | FSC1-FSC23 |
| **Exclusivity strains** | | |
| 1 | *Enterobacter aerogenes* | DMST 37332 |
| 2 | *Citrobacter freundii* | FSC-62-Cit 01 |
| 3 | *Citrobacter diversus* | FSC-62-Cit 02 |
| 4 | *Shigella boydii* | DMST 30245 |
| 5 | *Shigella flexneri* | DMST 17562 |
| 6 | *Shigella sonnei* | DMST 30358 |
| 7 | *Shigella dysenteriae* | FSC-62-Shi 01 |
| 8 | *Shigella boydii* | FSC-62-Shi 03 |
| 9 | *Shigella flexneri* | FSC-62-Shi 04 |
| 10 | *Staphylococcus aureus* | DMST 46316 |
| 11 | *S. aureus* | DMST 46597 |
| 12 | *S. aureus* | DMST 46677 |
| 13 | *Escherichia coli* | DMST 44476 |
| 14 | *E. coli* | DMST 44477 |
| 15 | *E. coli* | DMST 45559 |
| 16 | *Salmonella* Paratyphi B Var. Java | FSC-62-Sal-006 |
| 17 | *Salmonella* Abony | FSC-62-Sal-009 |
| 18 | *Salmonella* Paratyphi A | FSC-62-Sal-003 |
| 19 | *Salmonella* Heidelberg | FSC-62-Sal-005 |
| 20 | *Salmonella* Stanley | FSC-62-Sal-007 |
| 21 | *Salmonella* Typhi | FSC-62-Sal-072 |
| 22 | *Salmonella* Enteritidis | FSC-62-Sal-082 |
| 23 | *Salmonella* Virchow | DMST 16859 |
| 24 | *Salmonella* Newport | FSC-62-Sal-072 |
| 25 | *Salmonella* Lexington | FSC-62-Sal-090 |
| 26 | *Salmonella* Tennessee | FSC-62-Sal-068 |
| 27 | *Salmonella* Corvallis | FSC-62-Sal-069 |
| 28 | *Salmonella* Typhimurium | FSC-62-Sal-018 |

**Table S2**

Excusive strains with estimated CFU/mL in each cocktail.

| **No.** | **Strains** | **CFU/mL** | **Cocktail No.** | **Results** |
| --- | --- | --- | --- | --- |
| 1 | *Enterobacter aerogenes* DMST 37332 | 1.2 × 106 | 1* | – |
| 2 | *Citrobacter freundii* FSC-62-Cit 01 | 1.2 × 106 |
| 3 | *Citrobacter diversus* FSC-62-Cit 02 | 1.2 × 106 |
| 4 | *Shigella boydii* DMST 30245 | 1.2 × 106 | 2 | – |
| 5 | *Shigella flexneri* DMST 17562 | 1.2 × 106 |
| 6 | *Shigella sonnei* DMST 30358 | 1.2 × 106 |
| 7 | *Shigella dysenteriae FSC-62-Shi 01* | 1.2 × 106 | 3 | – |
| 8 | *Shigella boydii FSC-62-Shi 03* | 1.2 × 106 |
| 9 | *Shigella flexneri FSC-62-Shi 04* | 1.2 × 106 |
| 10 | *Staphylococcus aureus* DMST 46316 | 1.2 × 106 | 4 | – |
| 11 | *S. aureus* DMST 46597 | 1.2 × 106 |
| 12 | *S. aureus* DMST 46677 | 1.2 × 106 |
| 13 | *Escherichia coli* DMST 44476 | 1.2 × 106 | 5 | – |
| 14 | *E. coli* DMST 44477 | 1.2 × 106 |
| 15 | *E. coli* DMST 45559 | 1.2 × 106 |
| 16 | *Salmonella* Paratyphi B Var. Java FSC-62-Sal-006 | 1.2 × 106 | 6 | – |
| 17 | *Salmonella* Abony FSC-62-Sal-009 | 1.2 × 106 |
| 18 | *Salmonella* Paratyphi A FSC-62-Sal-003 | 1.2 × 106 |
| 19 | *Salmonella* Heidelberg FSC-62-Sal-005 | 1.2 × 106 | 7 | – |
| 20 | *Salmonella* Stanley FSC-62-Sal-007 | 1.2 × 106 |
| 21 | *Salmonella* Typhi FSC-62-Sal-072 | 1.2 × 106 |
| 22 | *Salmonella* Enteritidis FSC-62-Sal-082 | 1.2 × 106 | 8 | – |
| 23 | *Salmonella* Virchow DMST 16859 | 1.2 × 106 |
| 24 | *Salmonella* Newport FSC-62-Sal-072 | 1.2 × 106 |
| 25 | *Salmonella* Lexington FSC-62-Sal-090 | 1.2 × 106 | 9 | – |
| 26 | *Salmonella* Tennessee FSC-62-Sal-068 | 1.2 × 106 |
| 27 | *Salmonella* Corvallis FSC-62-Sal-069 | 1.2 × 106 |
| 28 | *Salmonella* Typhimurium FSC-62-Sal-018 | 1.2 × 106 |

Cocktail No. 1-8 and No. 9 consisted of 3 and 4 strains of bacteria in the same genus, respectively. (*) Cocktail No.1 was a mix of different genus; (–) represents negative result.

**Fig. S1** Standard curve for protein estimation by Lowry method.


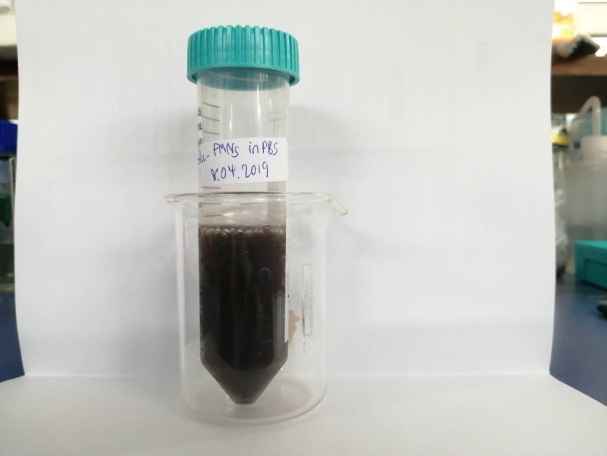

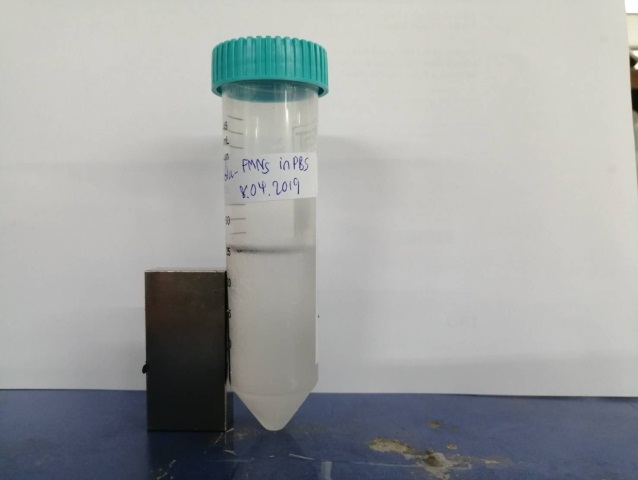


(A) (B)

**Fig. S2** Physical properties of amino-FMNs, (A); amino-FMNs were dispersed well in PBS and (B); amino-FMNs are separated by a magnet.


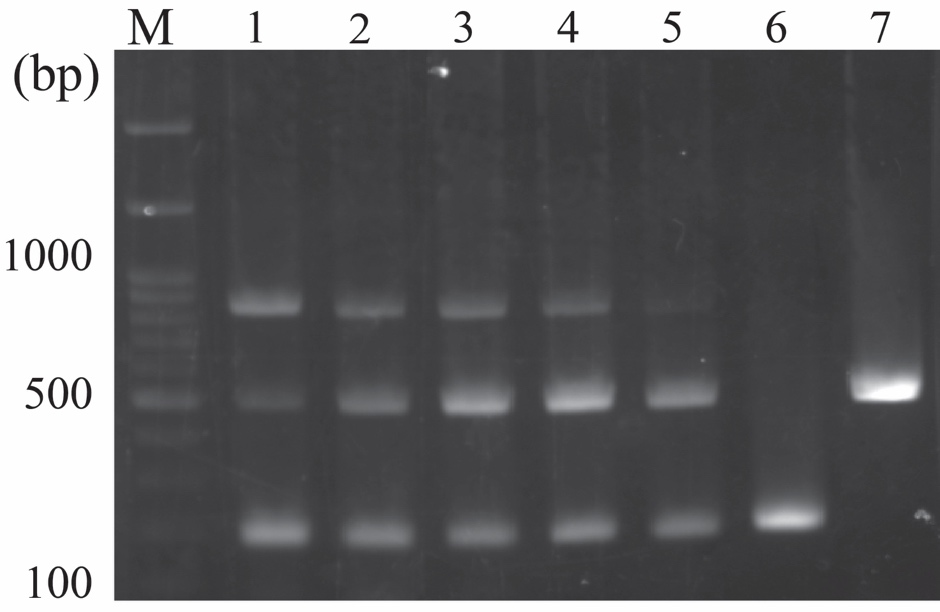


816 bp *Campylobacter* spp.

474 bp *C. jejuni*

184 bp *C. coli*

**Fig. S3** Multiplex PCR optimization for identification of *C. jejuni* ATCC 33560and *C. coli* NTCC 11353. Lane M, DNA ladder (bp); Lanes 1-5, concentration of each FW226 and 699RV varying at 0.1 to 0.5 µM, respectively, where concentration of C412F-C1288R and 346FW-529RV were fixed at 0.2 µM; Lanes 6-7, uniplex PCRs of *C. jejuni* and *C. coli* using 0.2 µM of specific primers.


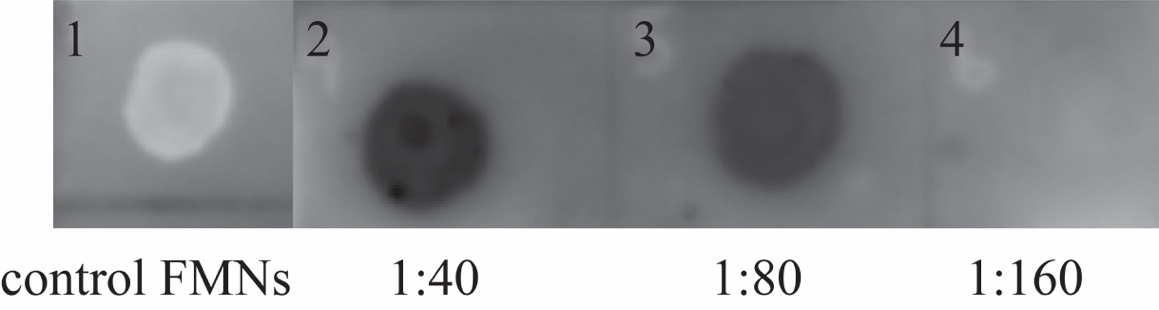


**Fig. S4** Dot blot analysis of loading of anti–MEA pAb on FMNs surface.
